# Supplementary material for: Structural basis of ligand recognition and design of antihistamines targeting histamine H4 receptor
Source: PubMed Central journal article supplement (PMC10954740; doi:10.1038/s41467-024-46840-5), 2024-03-20
Supplement: 41467_2024_46840_MOESM1_ESM.pdf [file 41467_2024_46840_MOESM1_ESM.pdf]

**a**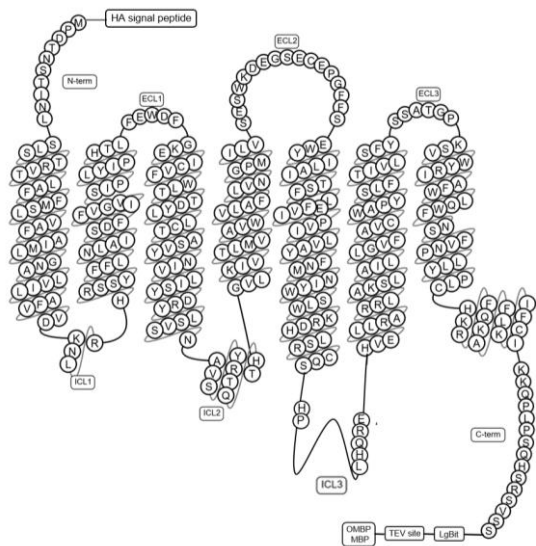**b**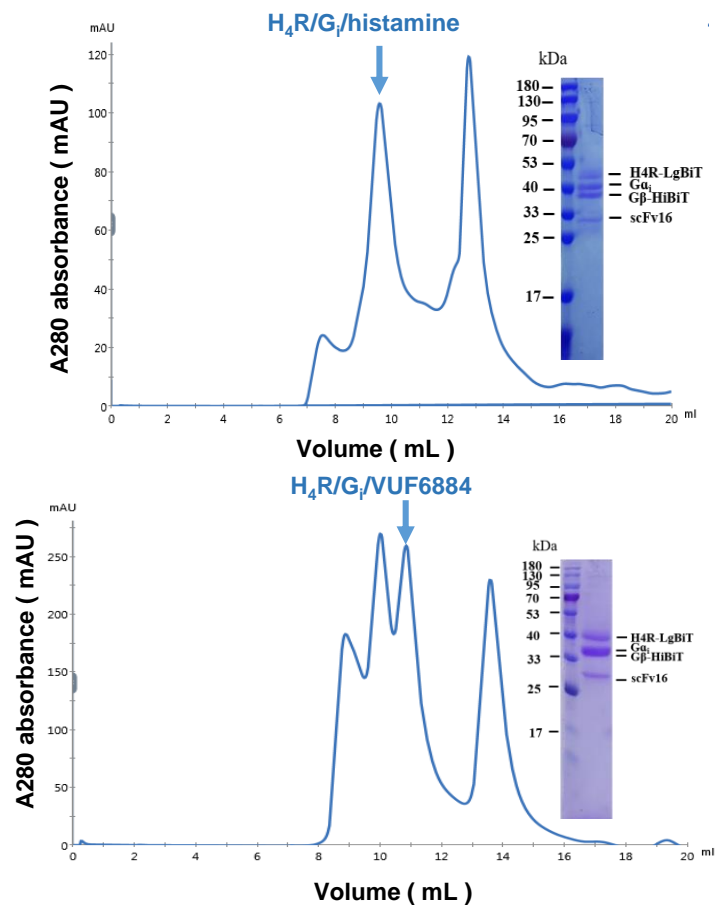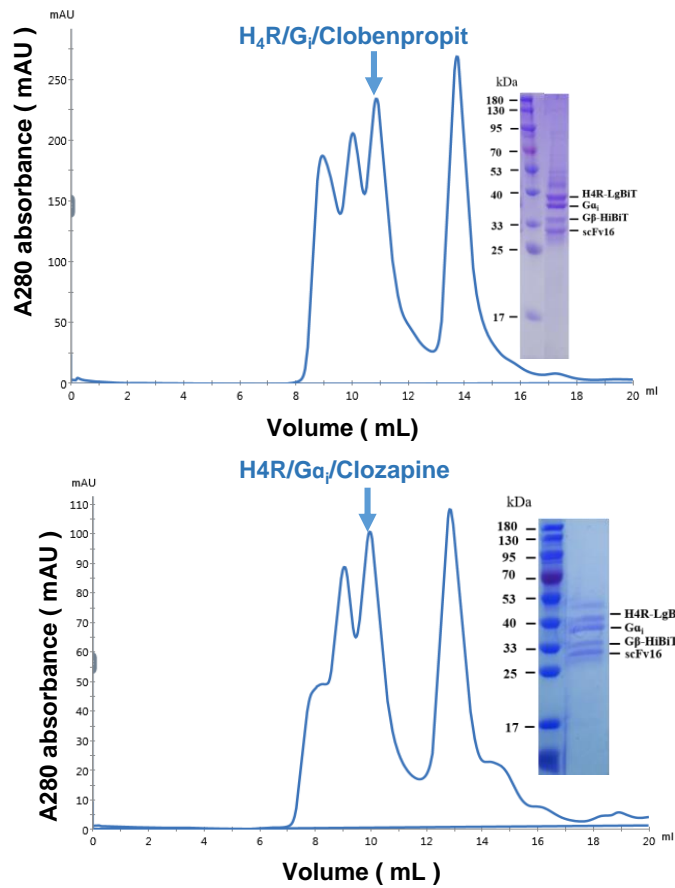**c****Histamine-bound H<sub>4</sub>R/G<sub>i</sub>**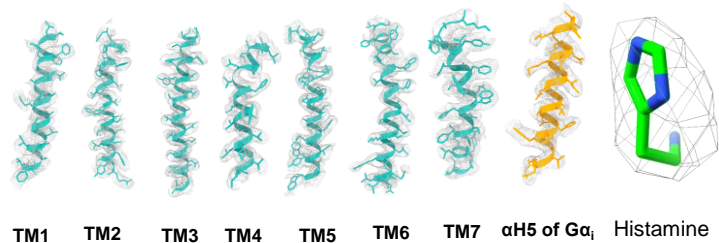**Clobenpropit-bound H<sub>4</sub>R/G<sub>i</sub>**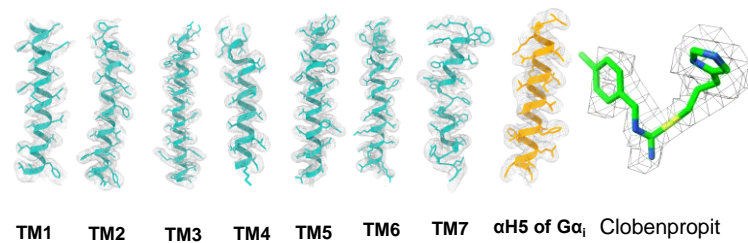**VUF6884-bound H<sub>4</sub>R/G<sub>i</sub>**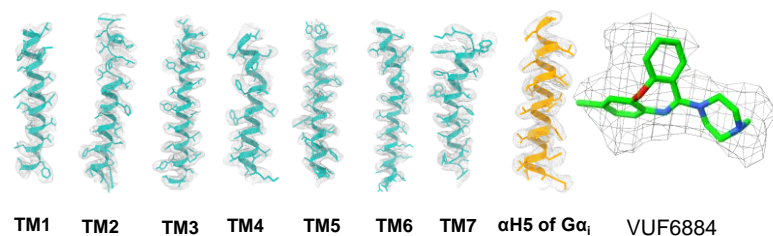**Clozapine-bound H<sub>4</sub>R/G<sub>i</sub>**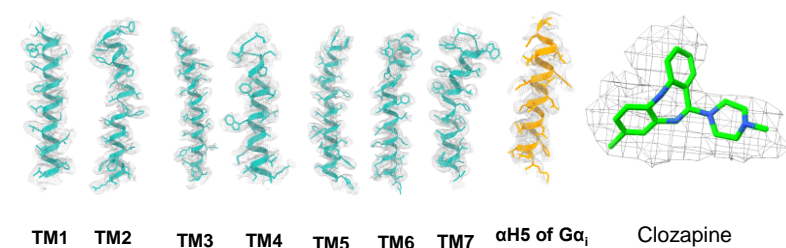

**Supplementary Fig. 1 Expression and purification of H<sub>4</sub>R.** **a**, A snake-shaped diagram of the H<sub>4</sub>R construct used in complex assembling, the diagram was adopted from GPCRdb. **b**, Size exclusion column profiles and SDS-PAGE analysis of H<sub>4</sub>R/G<sub>i</sub> complexes. Source data are provided as a Source Data file. **c**, Cryo-EM density map of representative regions of H<sub>4</sub>R/G<sub>i</sub> complexes. Map level was set to 0.08 in chimeraX.

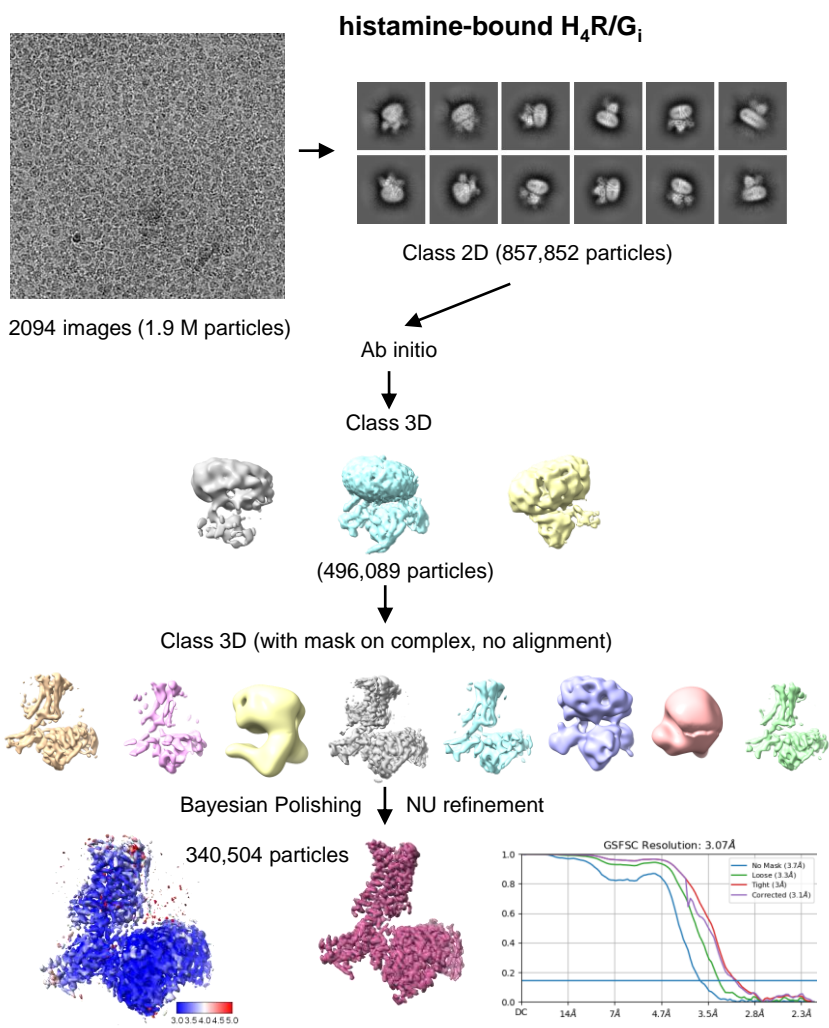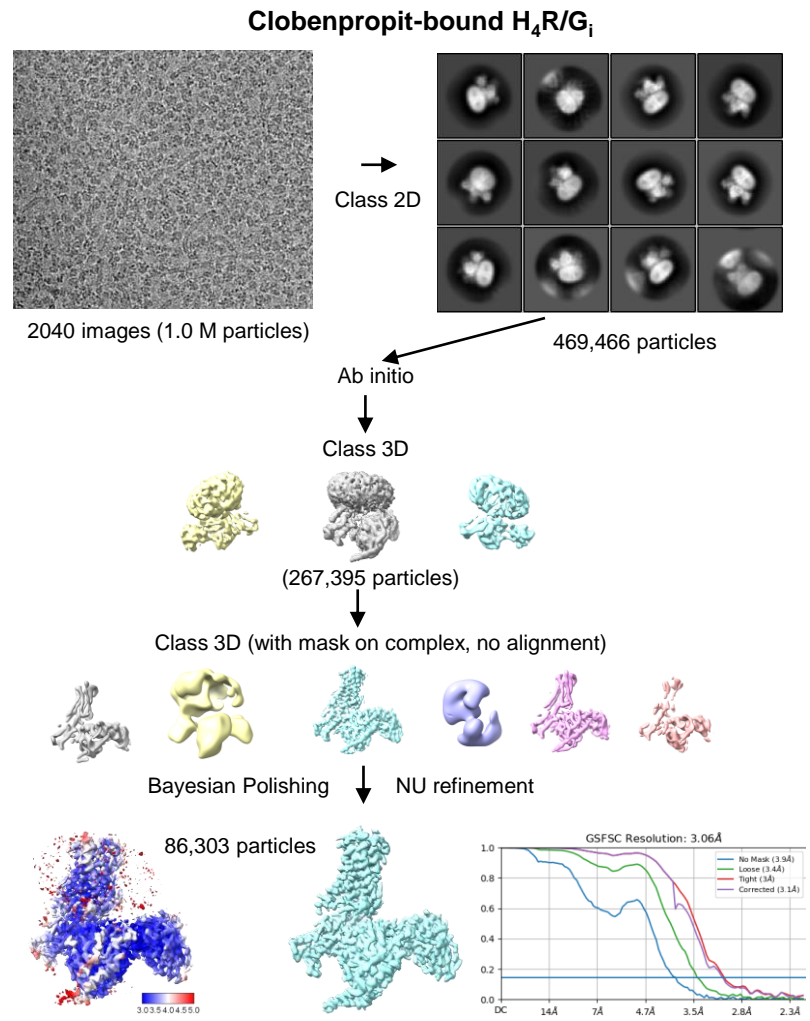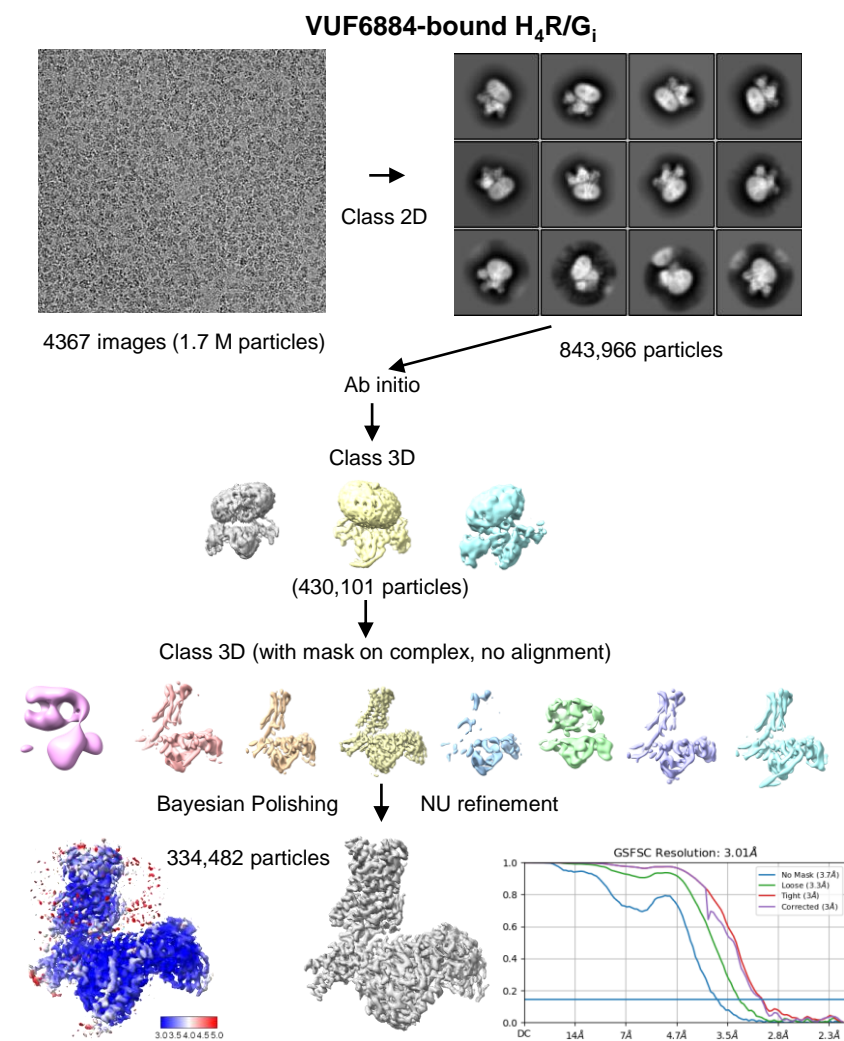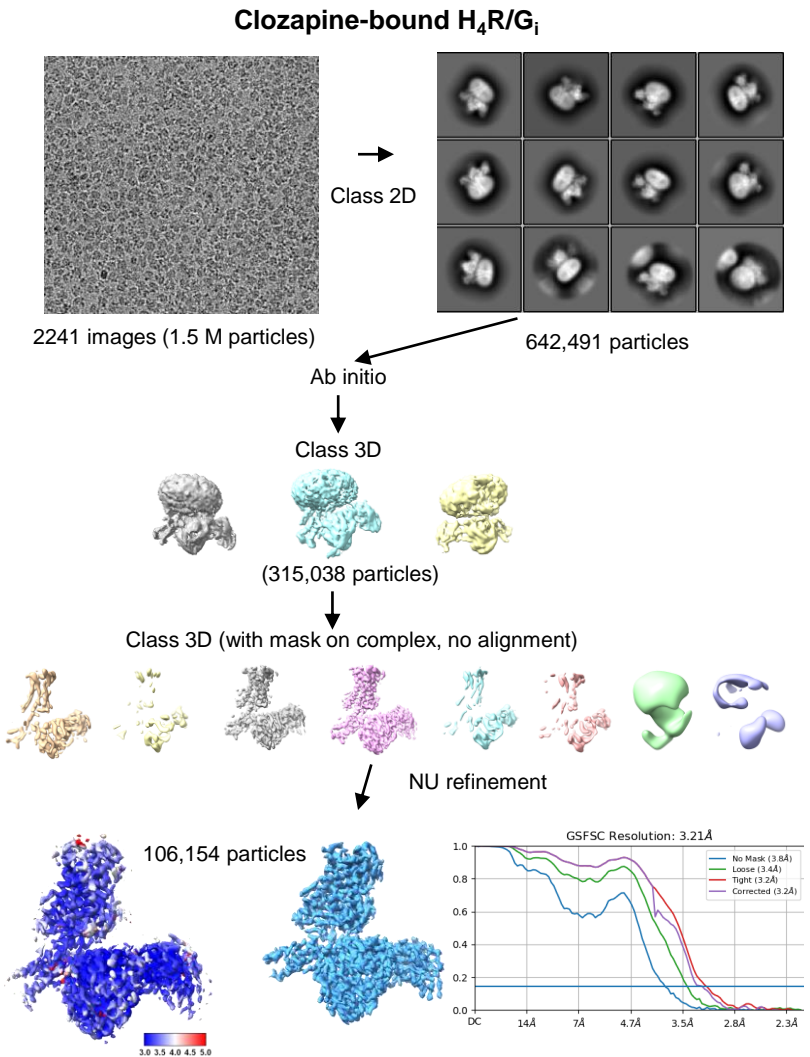

**Supplementary Fig. 2** Flow-chart of cryo-EM data process of  $H_4R/G_i$  complexes. The image process, 2D, 3D classification and Bayesian Polishing were done by Relion, others were done by CryoSparc.



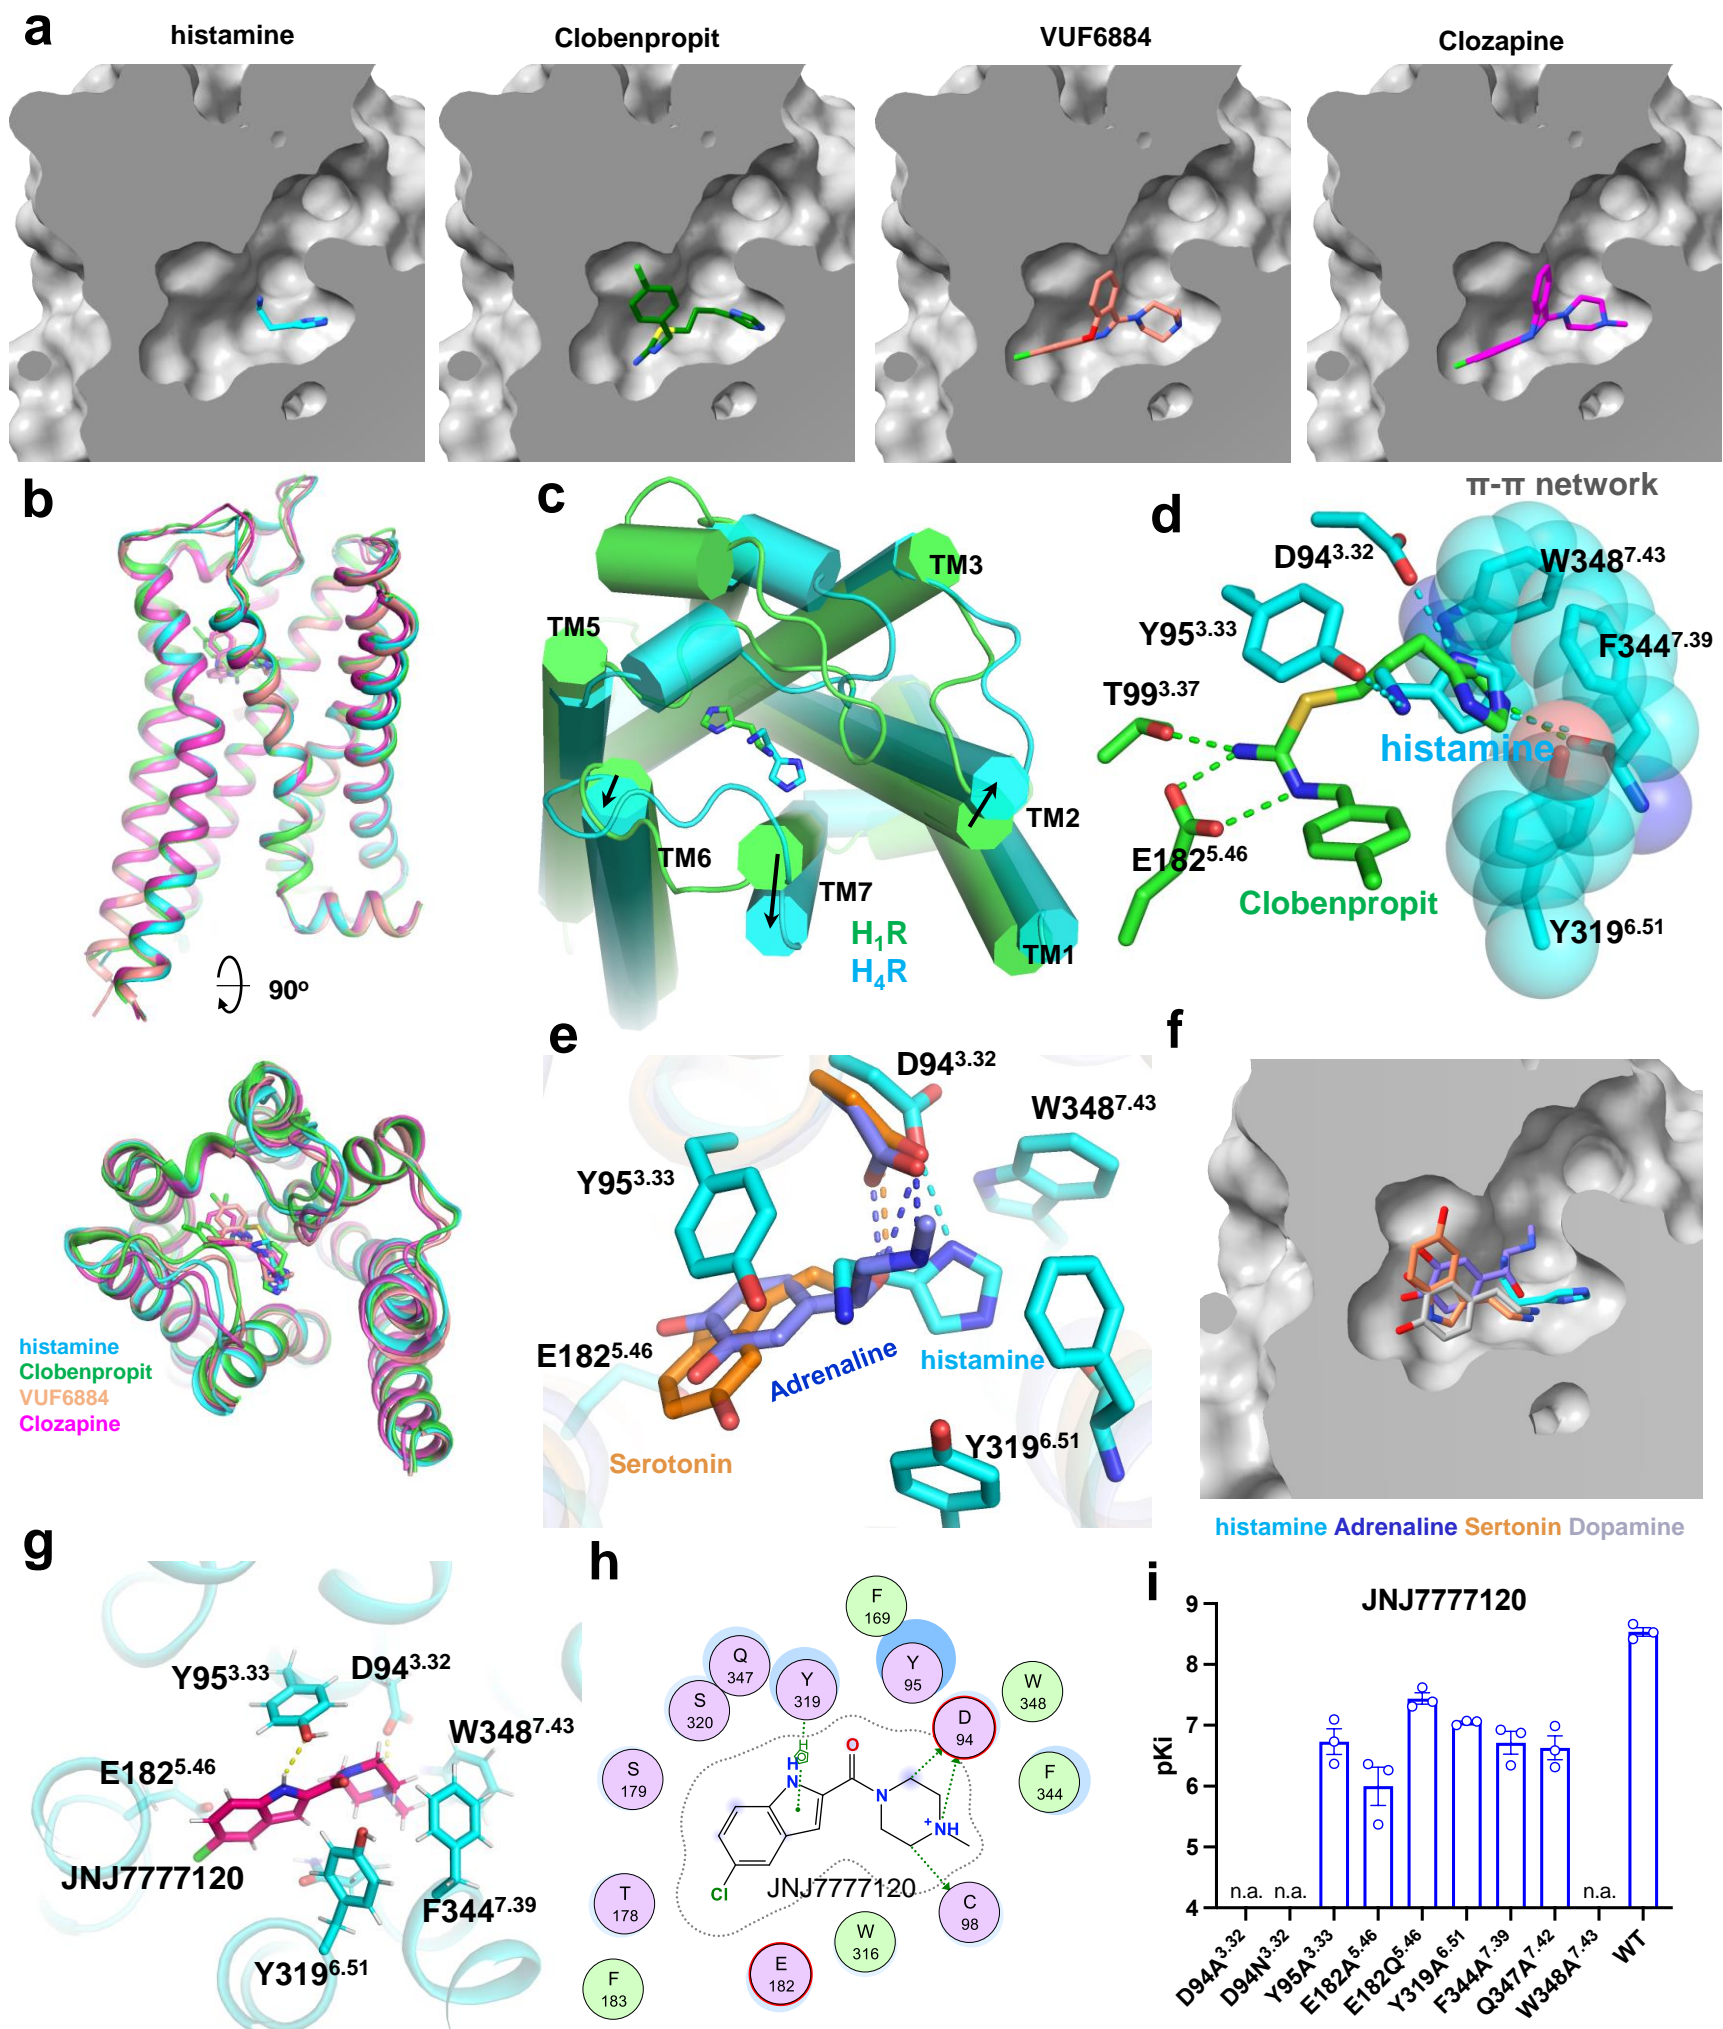

**Supplementary Fig. 3 Additional information of the ligand binding pocket of H<sub>4</sub>R.** **a**, The clipping view of the ligand binding pocket bound with histamine, Clobenpropit, VUF6884 and Clozapine. **b**, An comparison of the overall structures of histamine, Clobenpropit, VUF6884 and Clozapine-bound H<sub>4</sub>R. **c**, A comparison of histamine-bound H<sub>1</sub>R and H<sub>4</sub>R from the top view. **d**, A comparison of ligand/receptor interaction of the histamine-bound H<sub>4</sub>R with the Clobenpropit-bound H<sub>4</sub>R. **e**, A comparison of adrenaline (PDB: 4ldo) binding in  $\beta_2$ AR and serotonin binding in 5-HT<sub>1A</sub> (PDB: 7e2y) with that of histamine in H<sub>4</sub>R. **f**, The clipping view of the ligand positions of histamine, dopamine, serotonin, adrenaline in the context of H<sub>4</sub>R. **g**, Docking of JNJ777120 into H<sub>4</sub>R. **h**, The ligand/receptor interaction of the docked JNJ777120 in H<sub>4</sub>R. **i**, pKi of H<sub>4</sub>R mutants in binding of JNJ777120. Data are presented as mean values  $\pm$  SEM.; n = 3 independent samples. Source data are provided as a Source Data file.

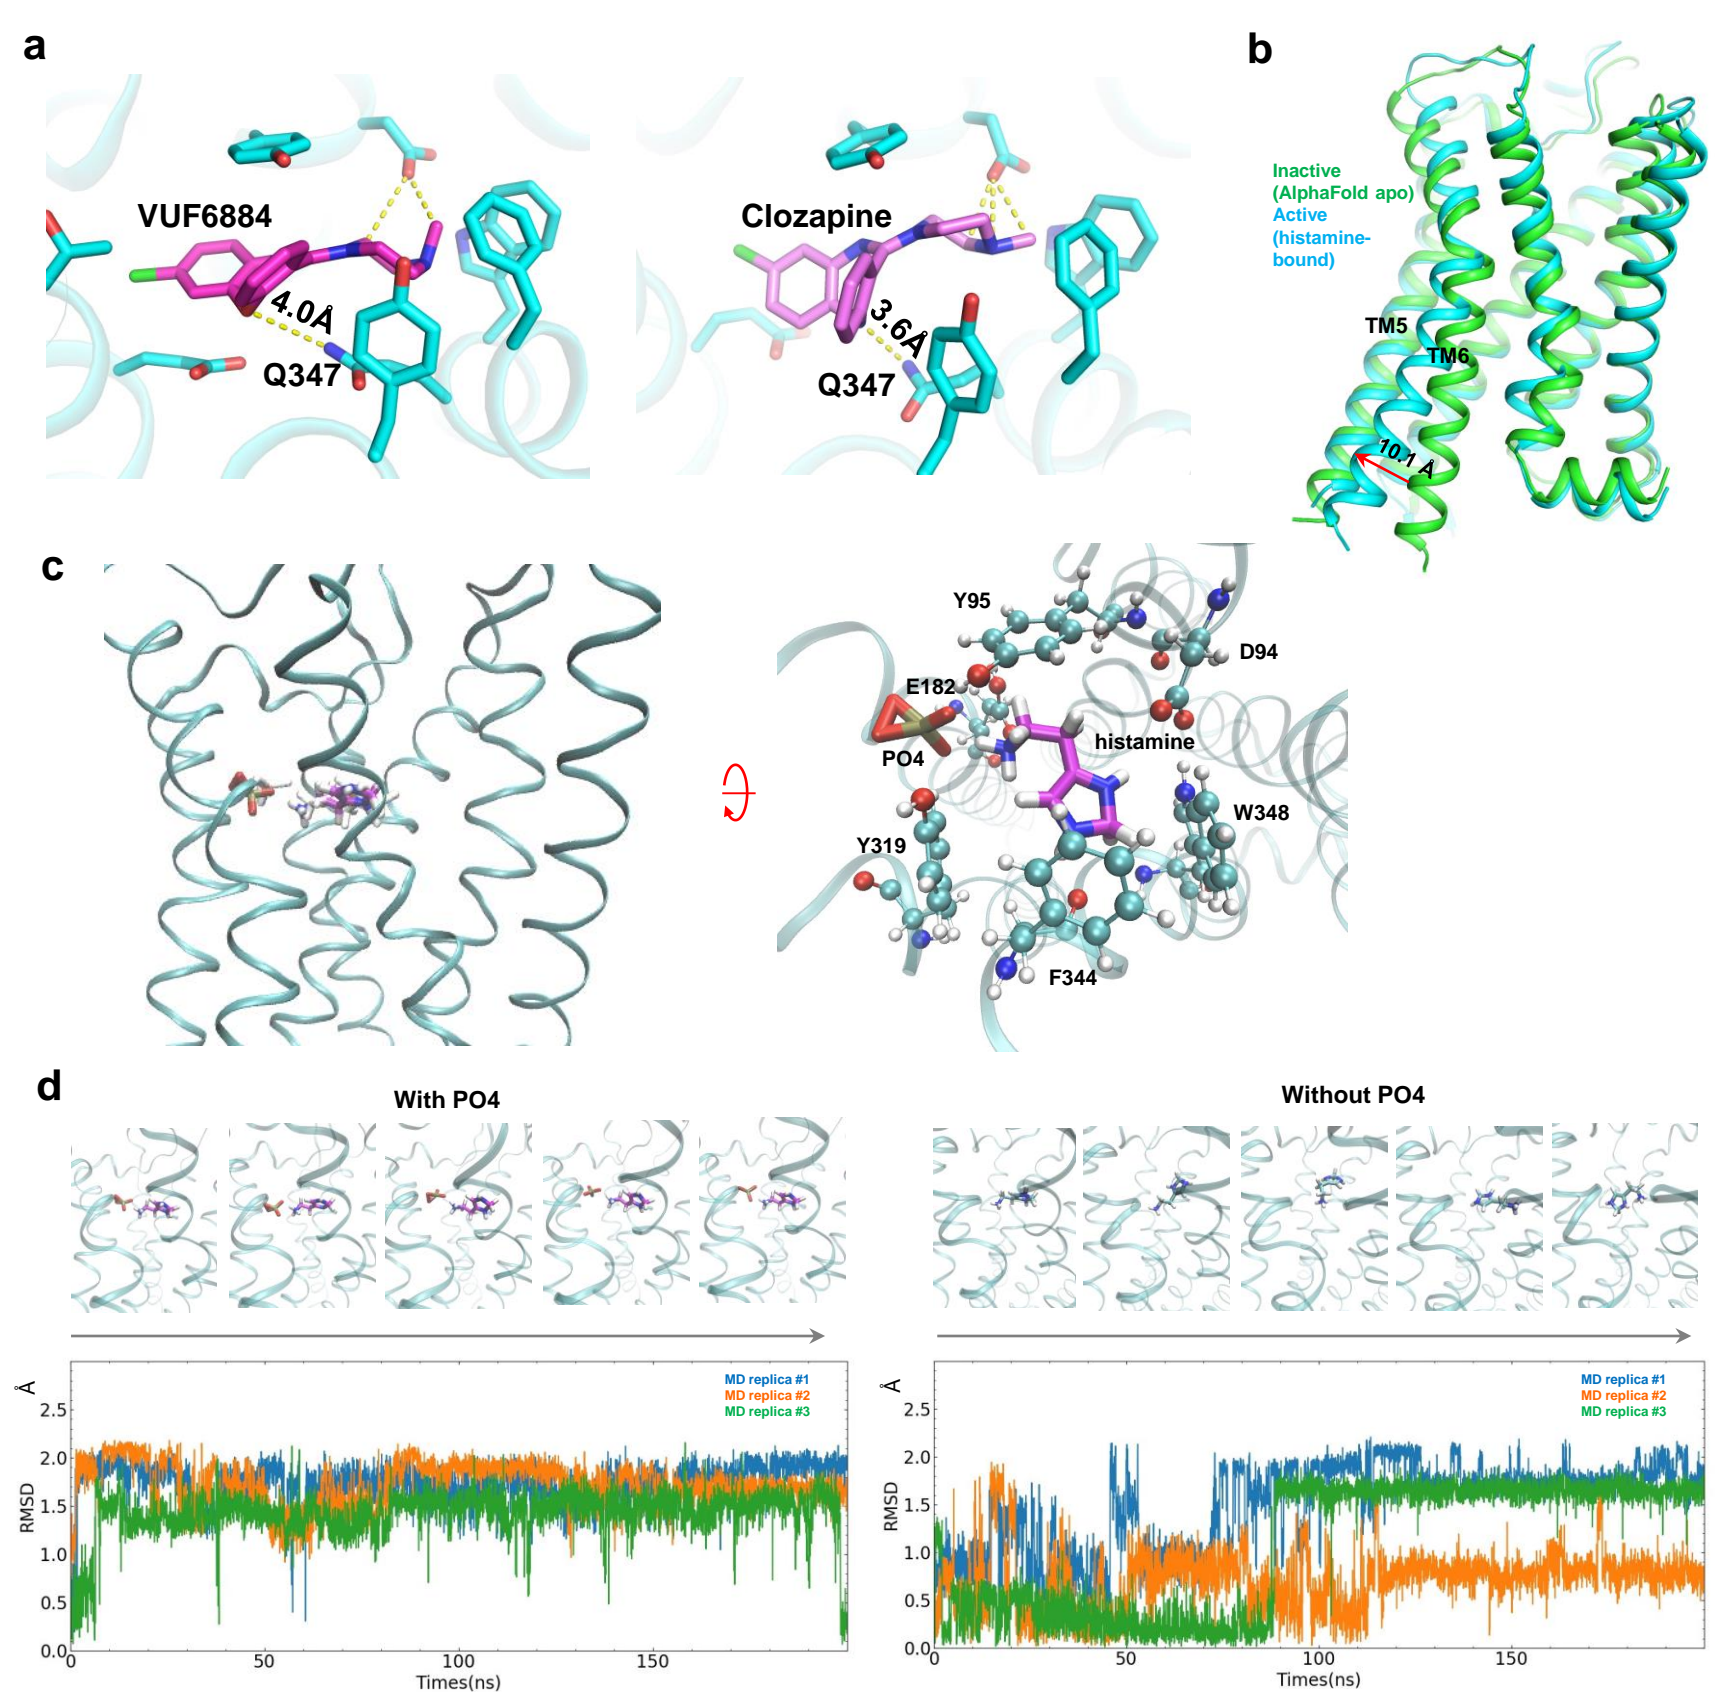

**Supplementary Fig. 4 Additional information of H<sub>4</sub>R ligand binding.** **a**, A comparison of VUF6884 and clozapine binding of H<sub>4</sub>R, focusing on Q347. **b**, A comparison of histamine-bound H<sub>4</sub>R with the AlphaFold prediction of apo H<sub>4</sub>R. **c**, A snapshot of MD simulations of histamine PO<sub>4</sub> co-binding of H<sub>4</sub>R. Left panel, the translucent white color indicates the original positions of histamine and PO<sub>4</sub> in the cryo-EM structure. **d**, The trajectory analysis of MD simulations of histamine binding with or without the anion PO<sub>4</sub> for H<sub>4</sub>R. The upper panels are snapshots of histamine binding with PO<sub>4</sub> (left) and without PO<sub>4</sub> (right) in sequential order during the 200 ns simulations. The lower panels are RMSD analysis of histamine during the 200 ns simulations.



### $[^3\text{H}]$ JNJ7777120 binding assay\_ homologous displacement (JNJ7777120)

**a**

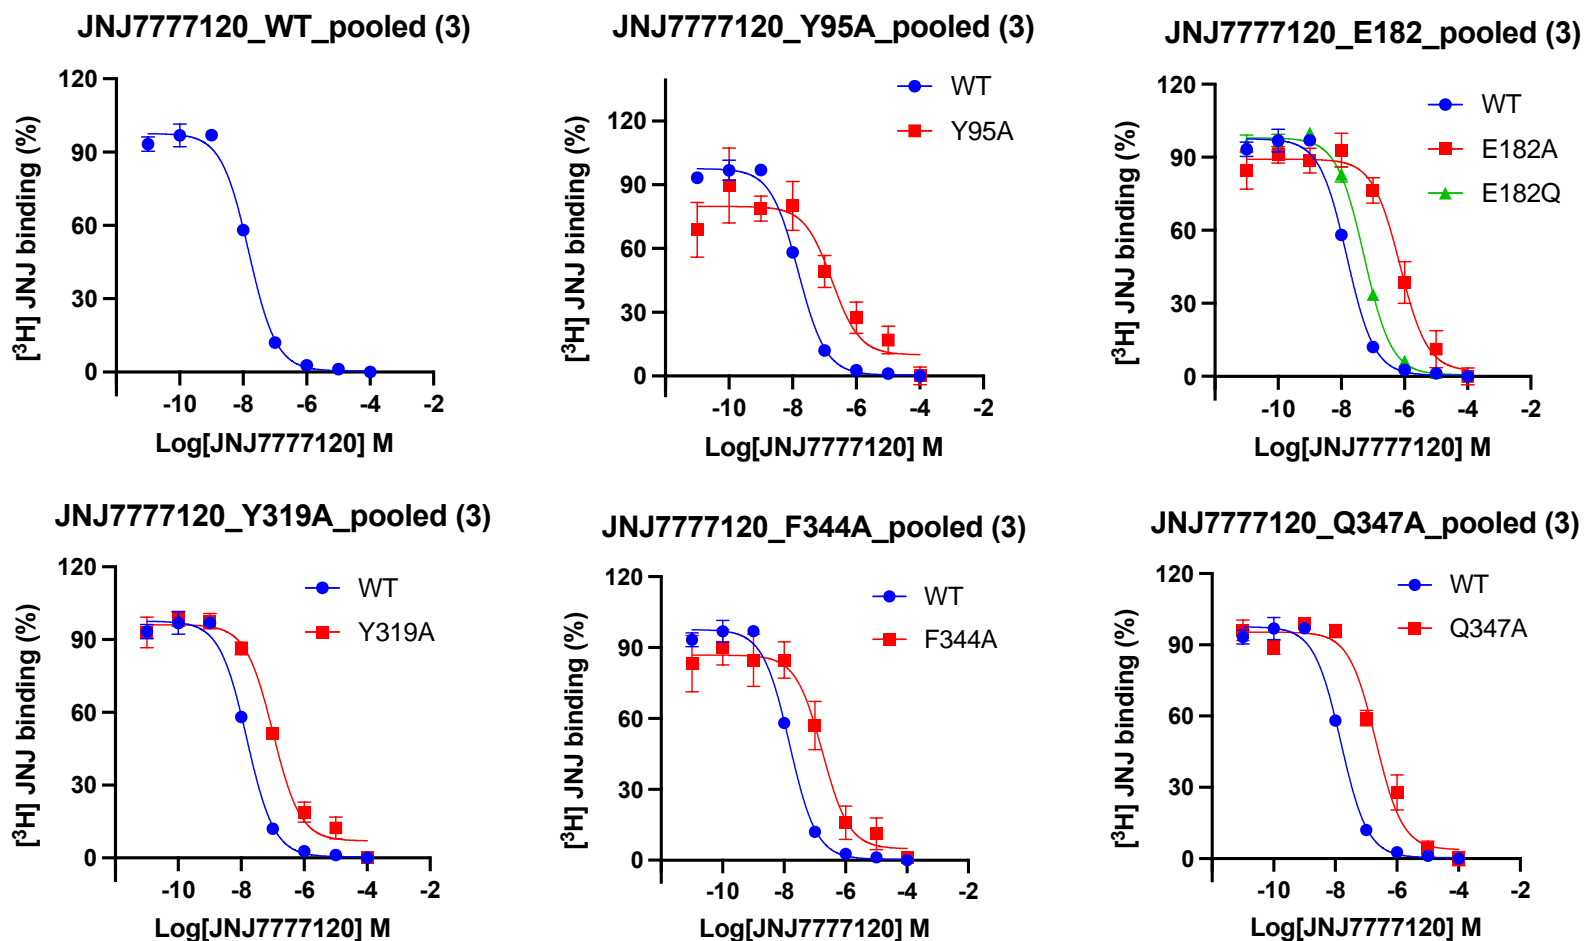

**b**

### $[^3\text{H}]$ JNJ7777120 binding assay\_ Histamine

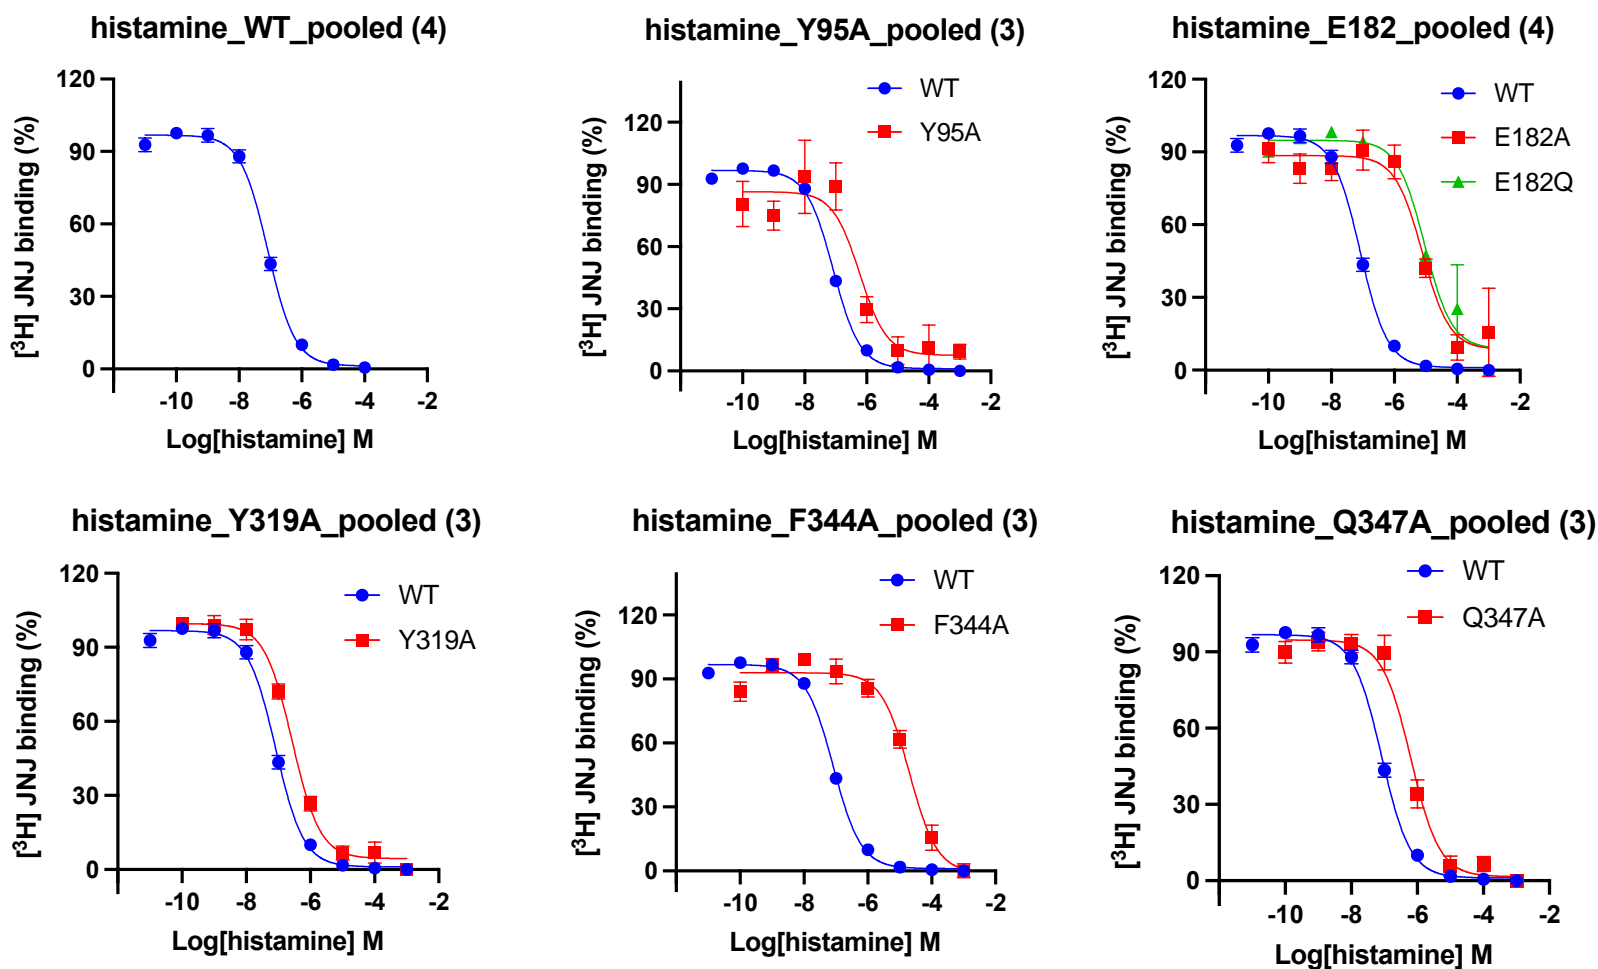

**Supplementary Fig. 5 Ligand binding assays of H<sub>4</sub>R mutants. a**,  $[^3\text{H}]$  JNJ7777120 binding assay via homologous displacement. **b**, The competition binding assay of histamine to  $[^3\text{H}]$  JNJ7777120. Data are presented as mean values  $\pm$  SEM.; n = 3-4 independent samples. Source data are provided as a Source Data file.

**a****[<sup>3</sup>H] JNJ7777120 binding assay\_ Clobenpropit**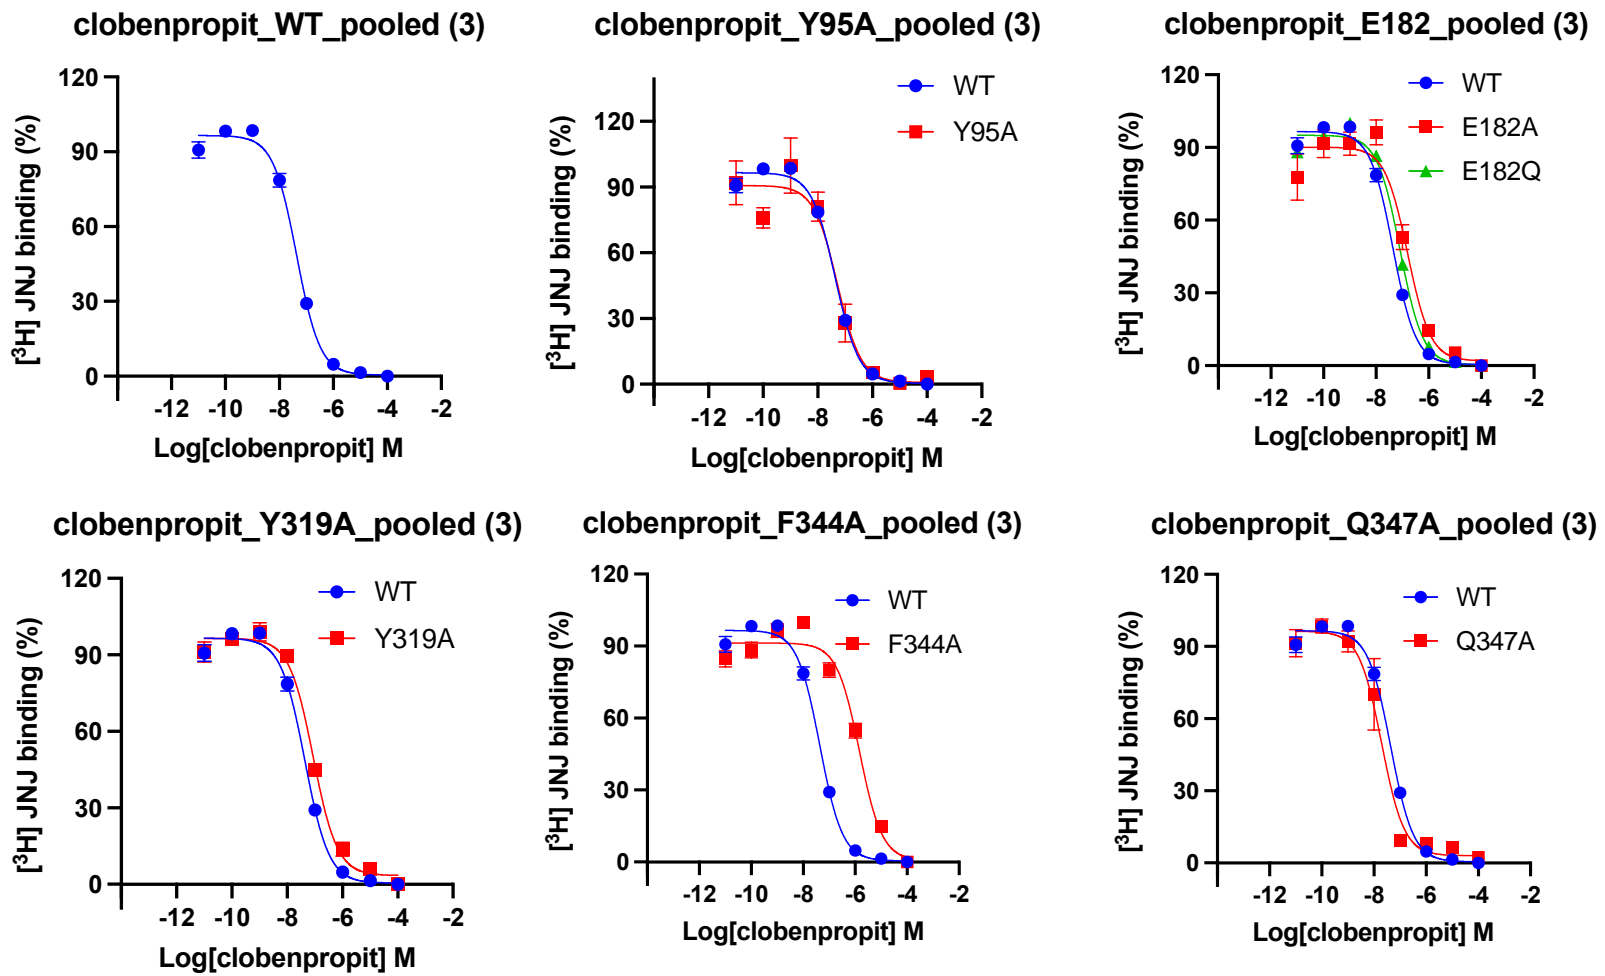**b****[<sup>3</sup>H] JNJ7777120 binding assay\_ VUF6884**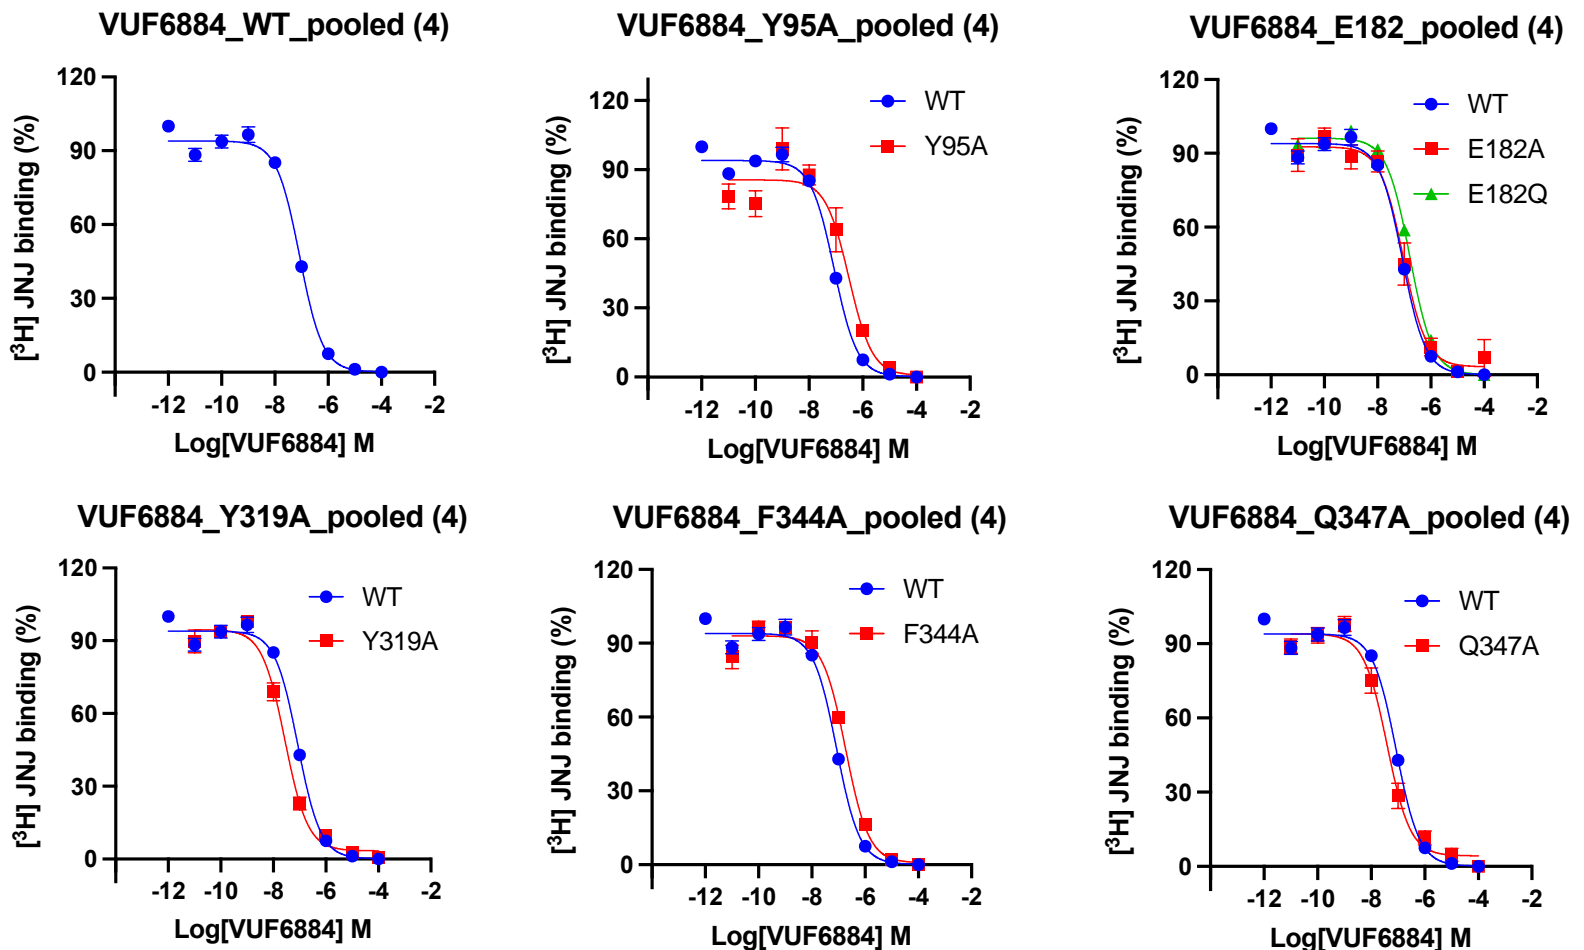

**Supplementary Fig. 6 Ligand binding assays of H<sub>4</sub>R mutants. a-b,** The competition binding assay of Clobenpropit and VUF9884, respectively, to [<sup>3</sup>H] JNJ7777120. Data are presented as mean values ± SEM.; n = 3-4 independent experiments. Source data are provided as a Source Data file.

**a****[<sup>3</sup>H] JNJ777120 binding assay\_ Clozapine**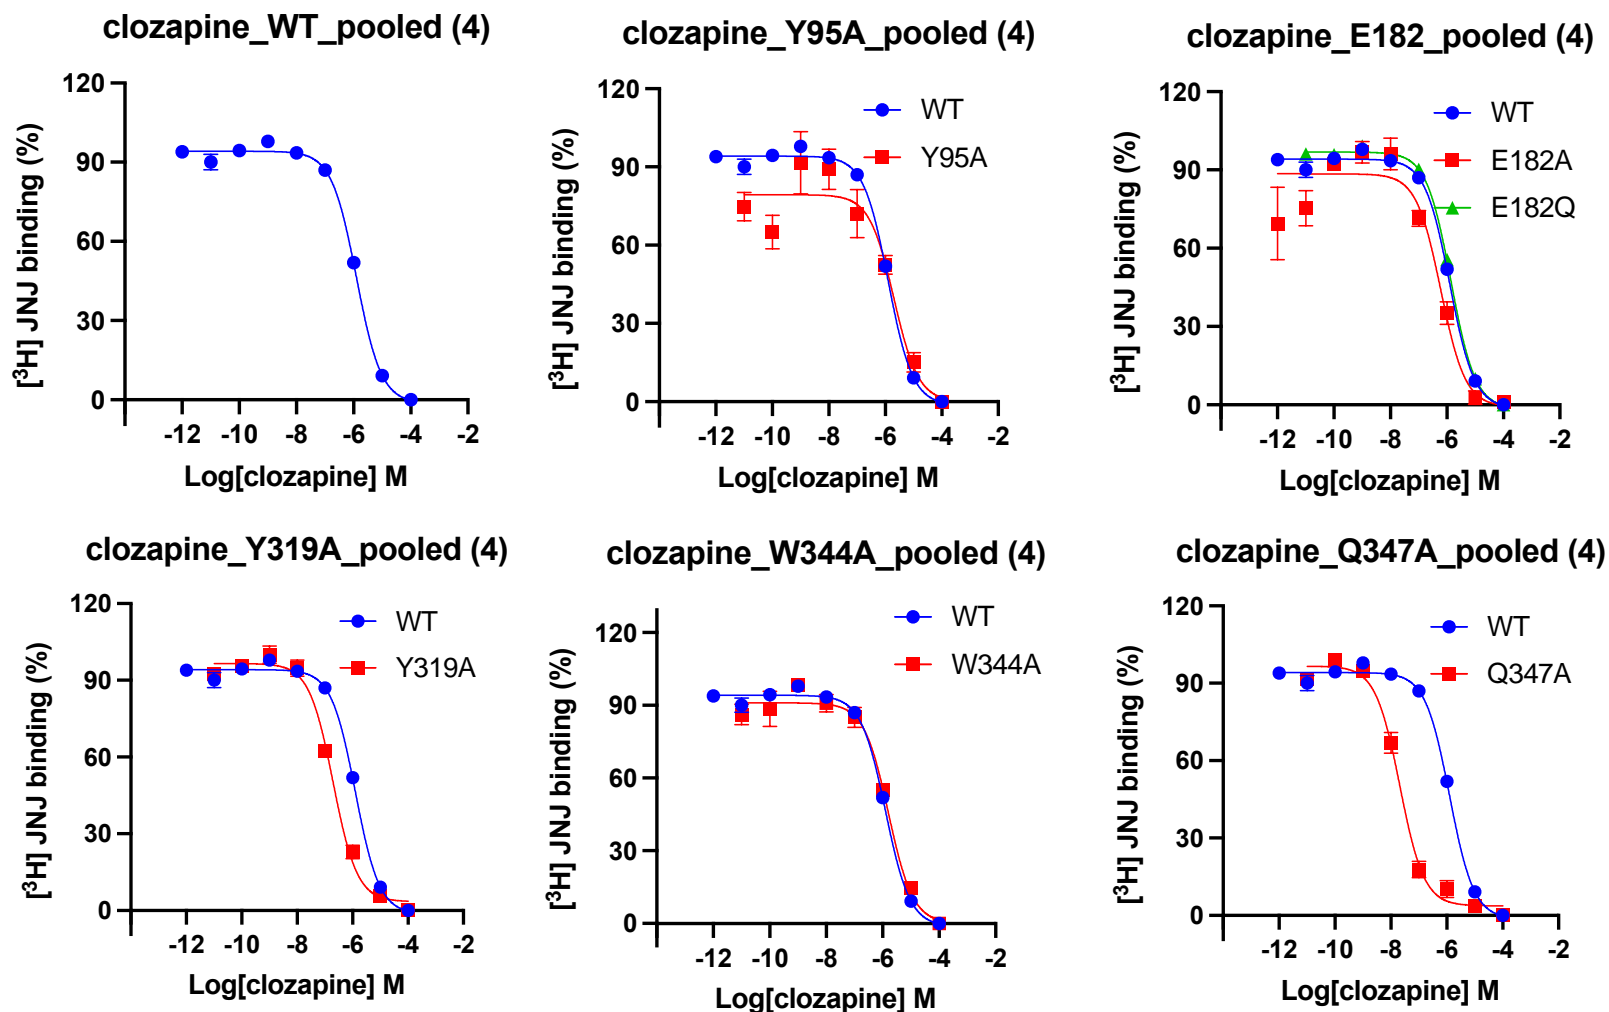**b**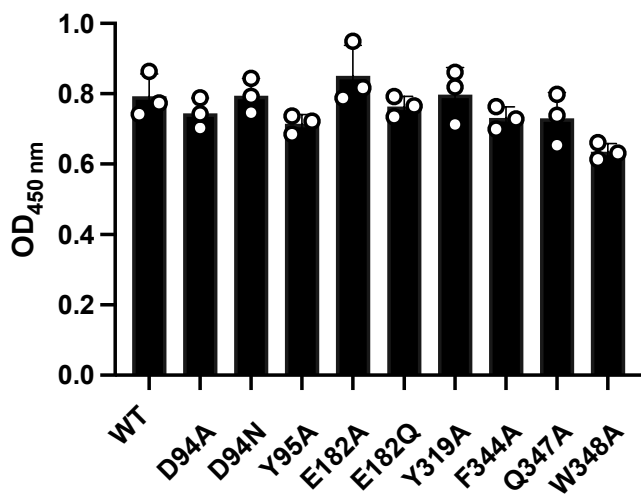

**Supplementary Fig. 7 Ligand binding assays of H<sub>4</sub>R mutants. a**, The competition binding assay of Clozapine to [<sup>3</sup>H] JNJ777120. **b**, The surface expression of H<sub>4</sub>R mutants (single experiment). Data are presented as mean values ± SEM.; n=4 independent experiments. Source data are provided as a Source Data file.

## Functional assay: $G_{\alpha i}$ activation biosensor\_Histamine

**a**

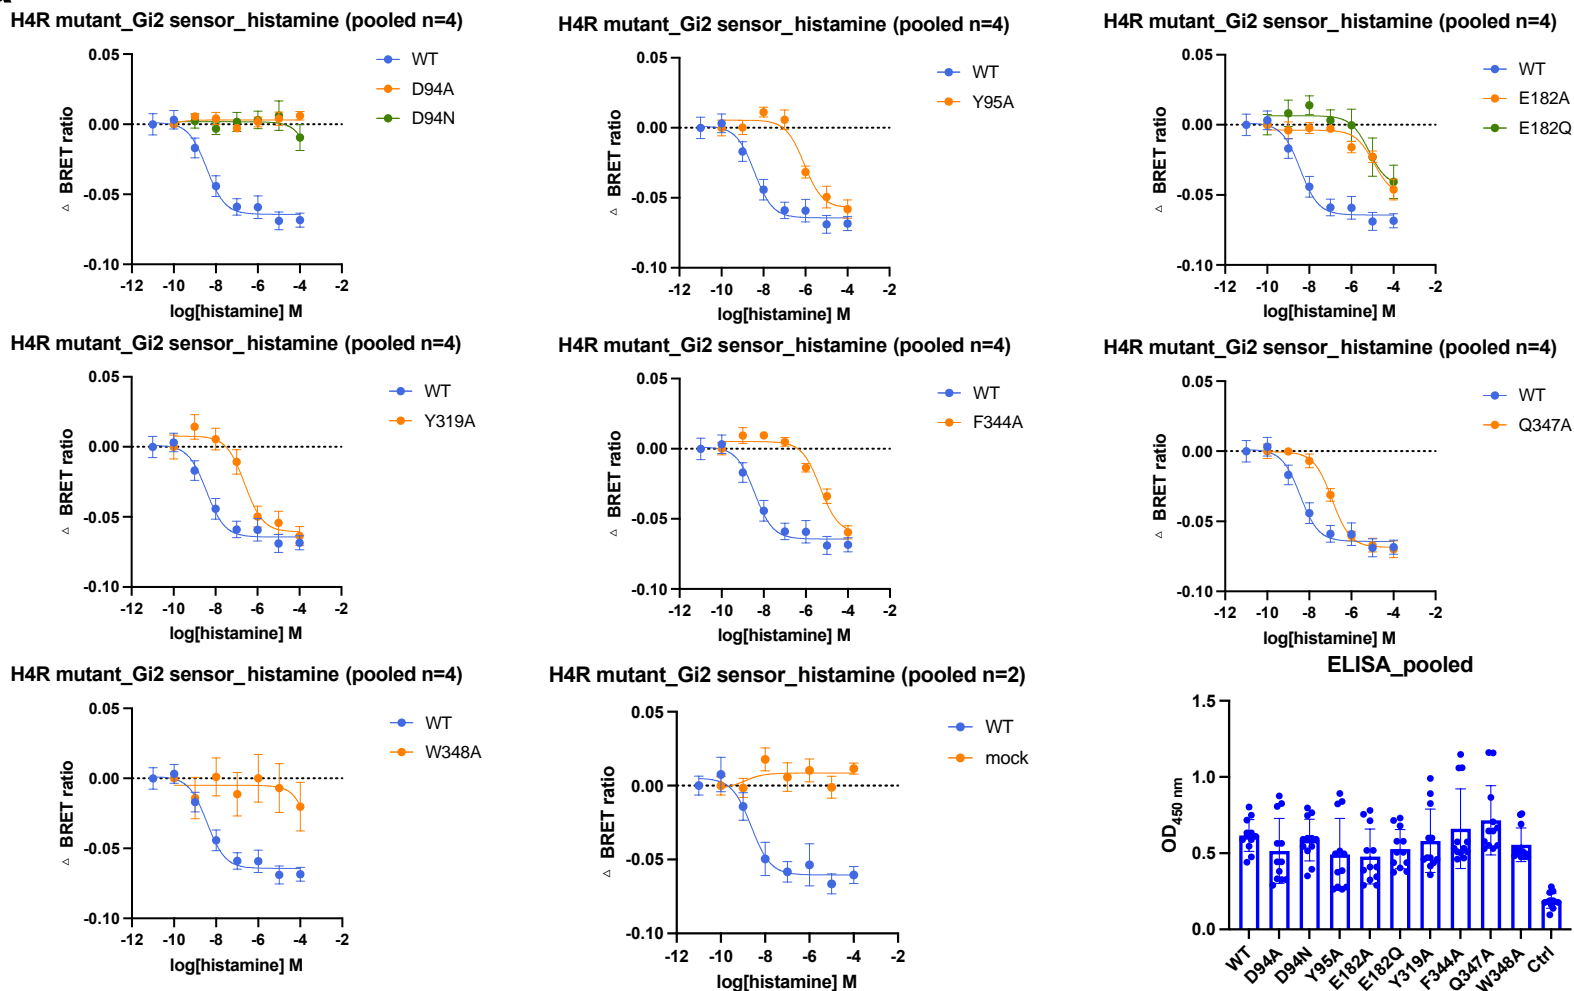

**b**

## $G_{\alpha i}$ activation biosensor\_Clobenpropit

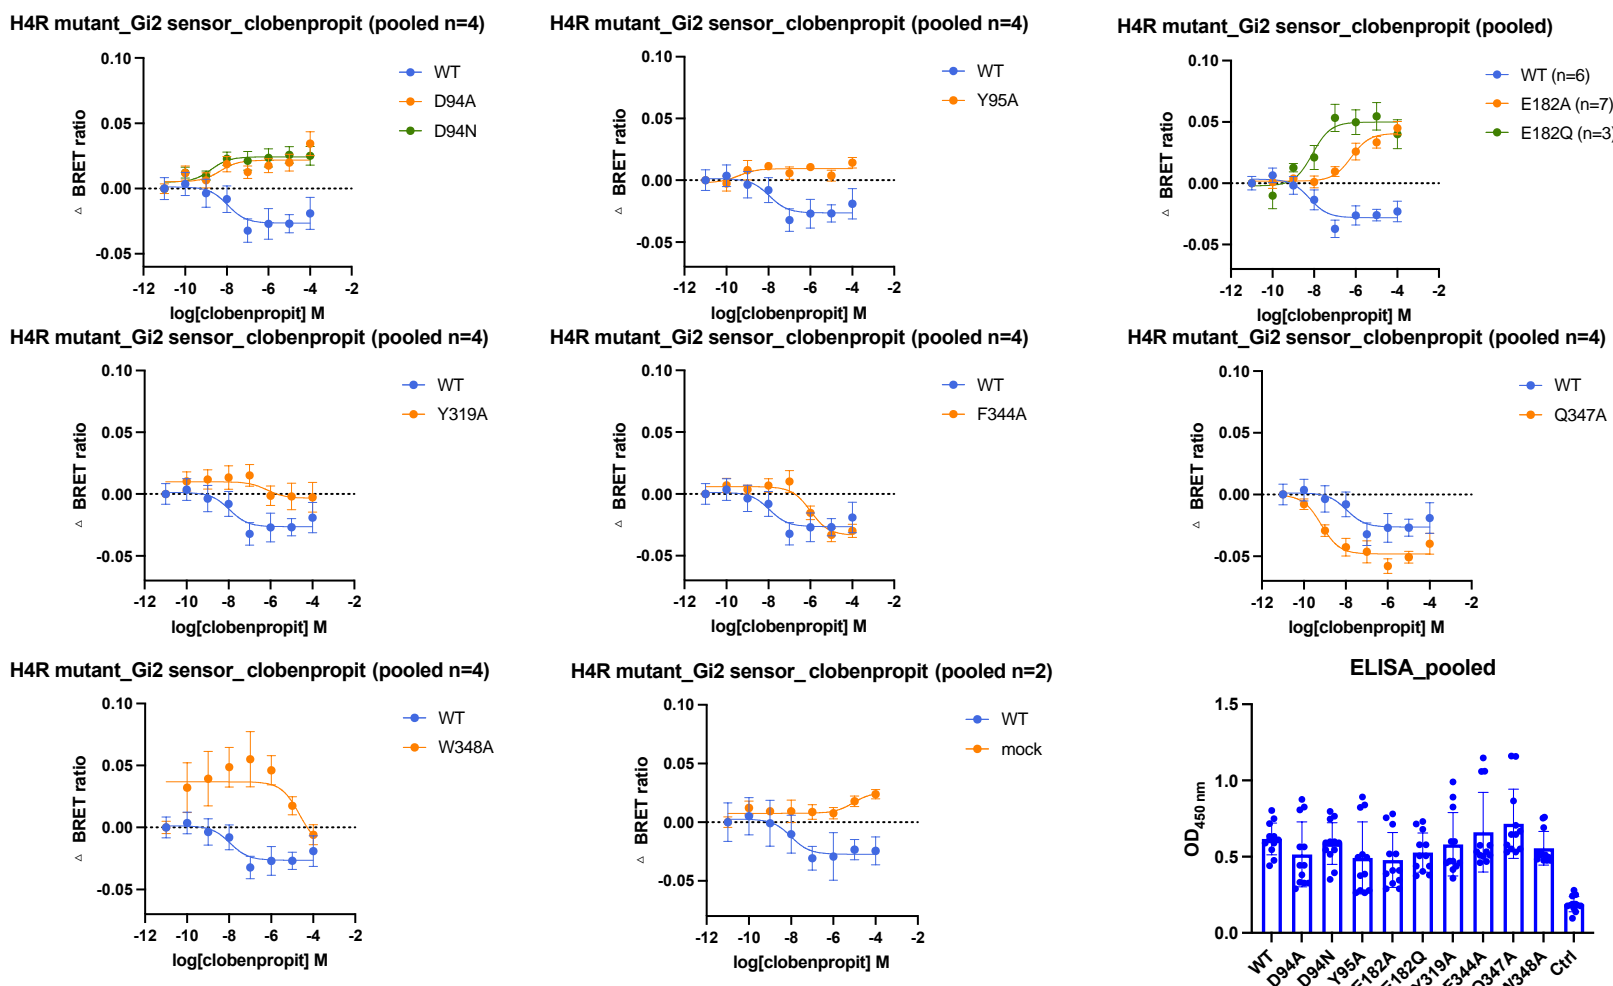

**Supplementary Fig. 8** The BRET  $G_i$  activation assays of  $H_4R$  mutants. **a-b**, The  $G_{\alpha i}$  biosensor BRET assays of  $H_4R$  activation via histamine and Clobenpropit, respectively. Data are presented as mean values  $\pm$  SEM.;  $n=3-7$  independent experiments,  $n=2$  for mock control experiment. Source data are provided as a Source Data file.



## G<sub>αi</sub> activation biosensor\_VUF6884

**a**

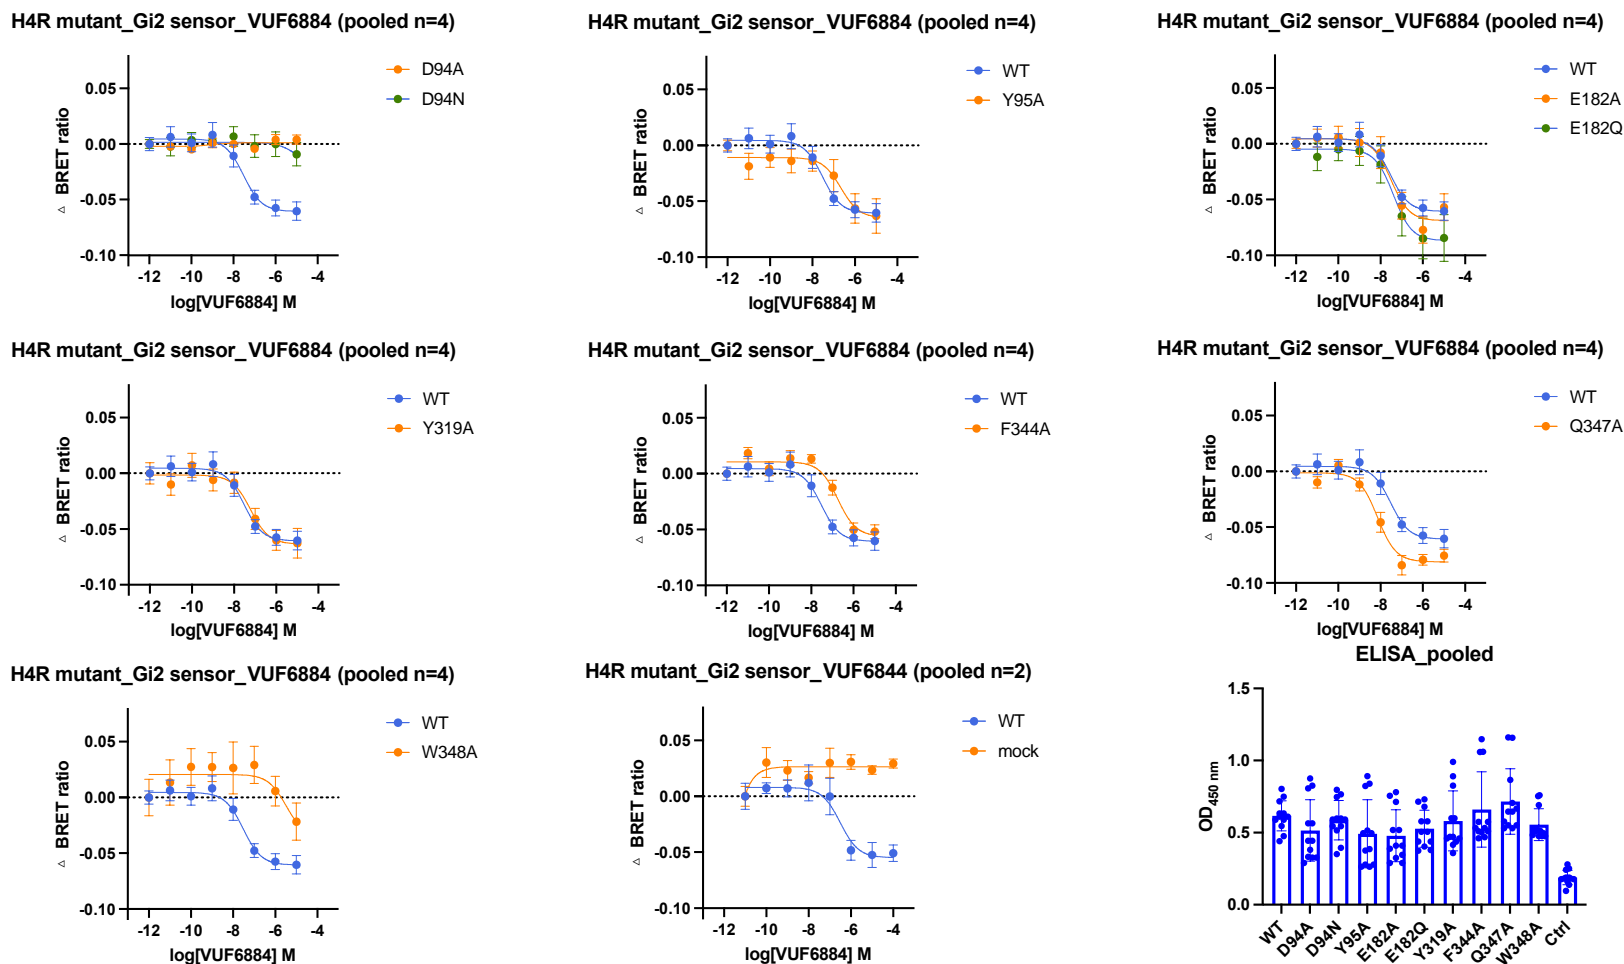

**b**

## Functional assay: G<sub>αi</sub> activation biosensor\_Clozapine

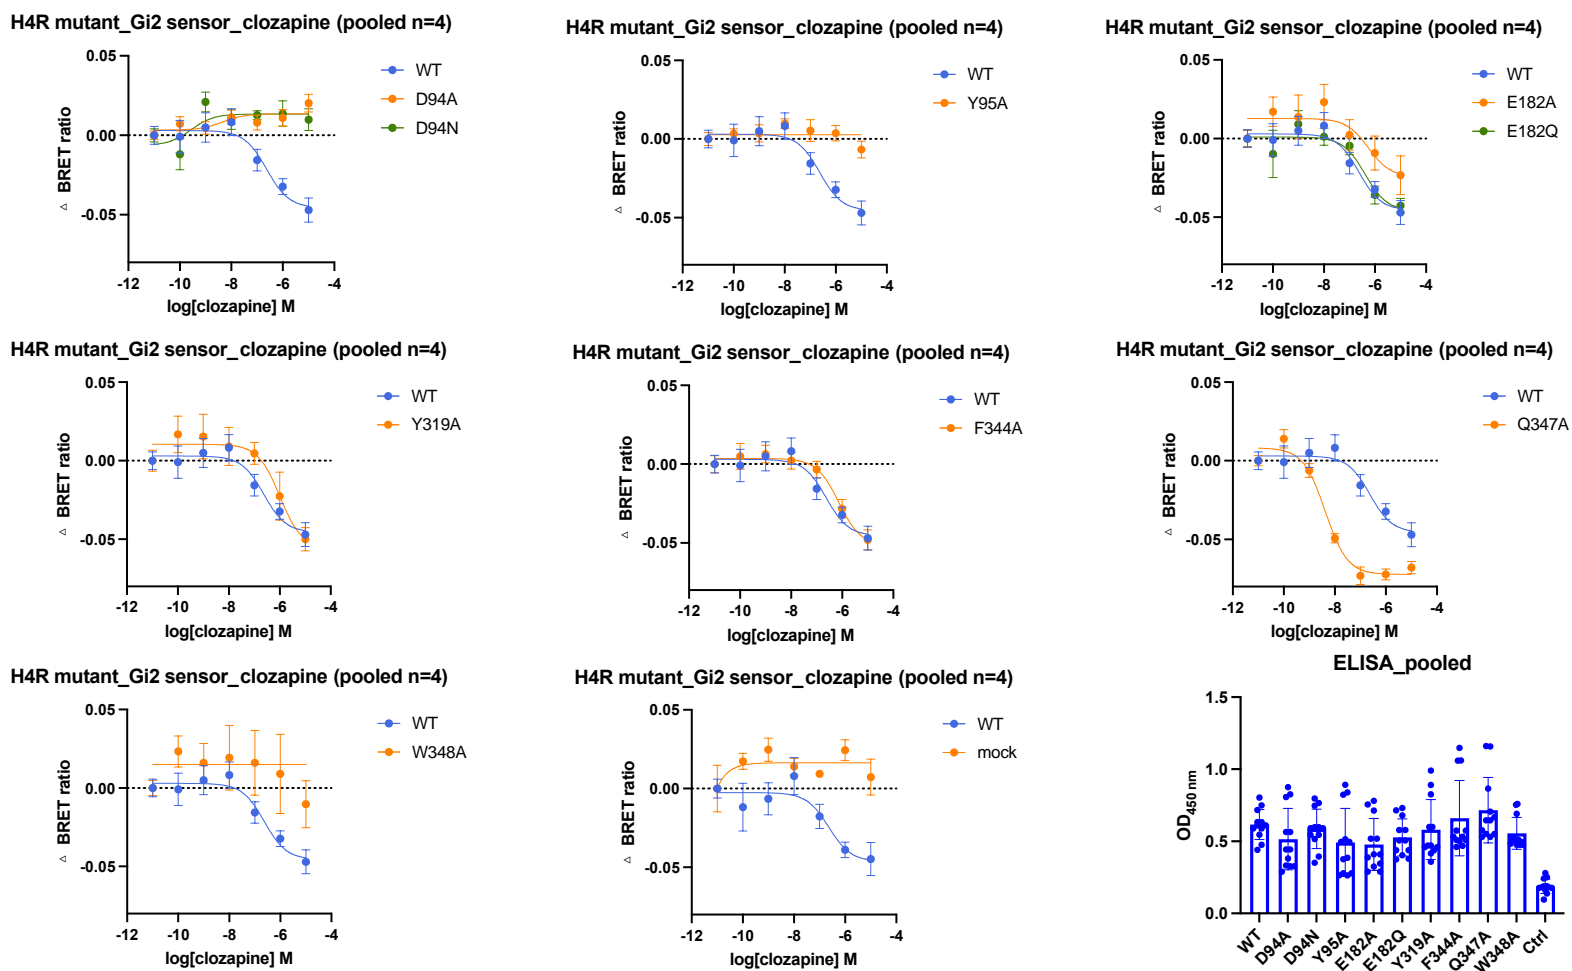

**Supplementary Fig. 9 The BRET G<sub>αi</sub> activation assays of H<sub>4</sub>R mutants. a-b,** The G<sub>αi</sub> biosensor BRET assays of H<sub>4</sub>R activation via VUF9884 and Clozapine, respectively. Data are presented as mean values ± SEM.; n = 3-4 independent experiments, n=2 for mock control experiment. Source data are provided as a Source Data file.

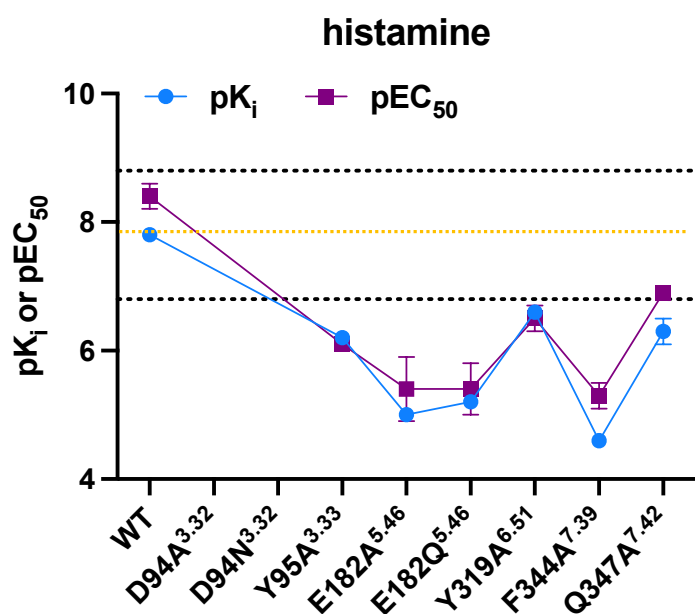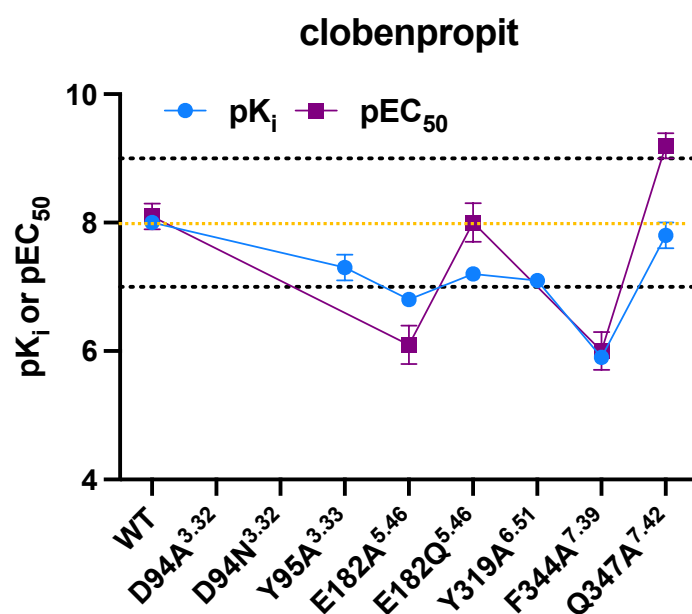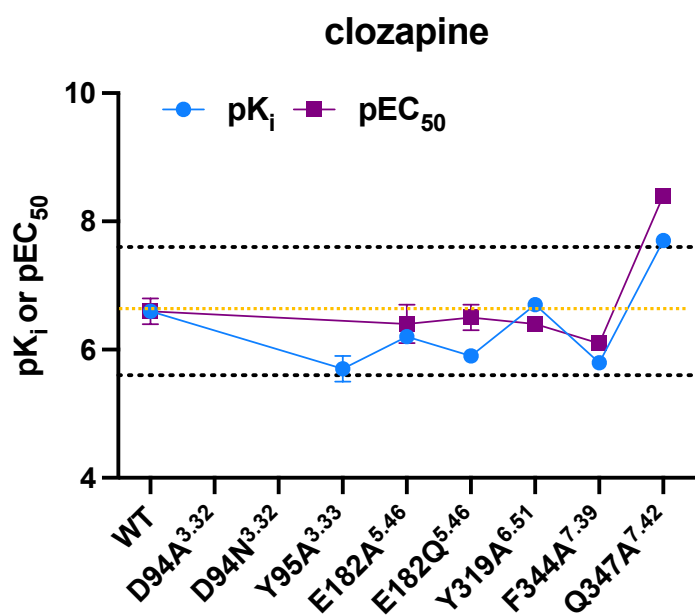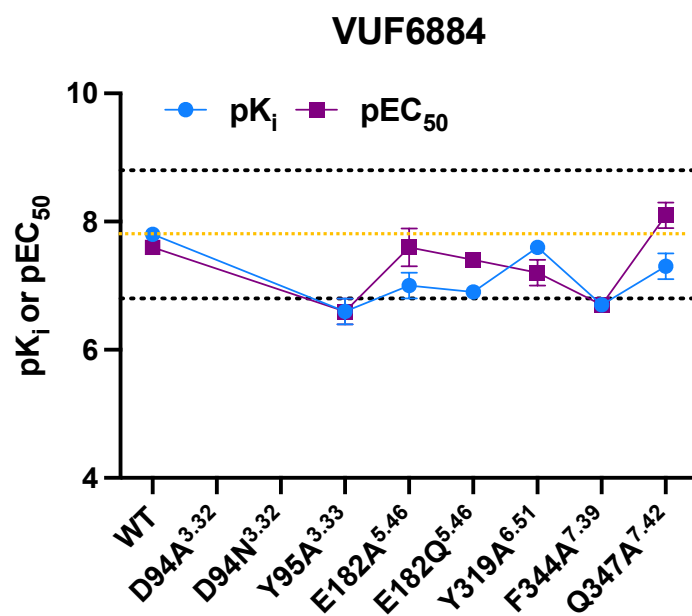

**Supplementary Fig. 10** An overview comparison between the RA binding and functional assay. Data are presented as mean values  $\pm$  SEM.; n =3-7 independent experiments. Source data are provided as a Source Data file.

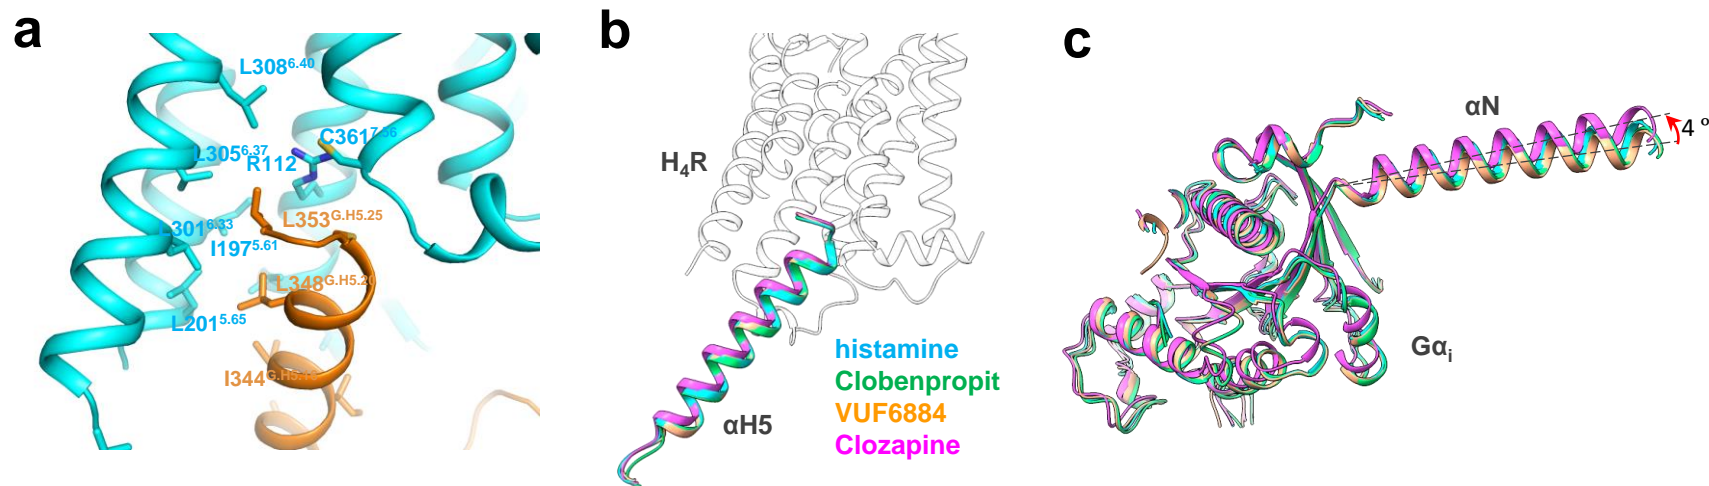

**Supplementary Fig. 11 Additional information of H<sub>4</sub>R/G<sub>i</sub> engagement. a**, The details of the hydrophobic interaction between αH5 and TM5-TM6 of the receptor. **b**, A comparison of the αH5/receptor interaction of the histamine, Clobenpropit, VUF9884 and Clozapine-bound H<sub>4</sub>R/G<sub>i</sub> complex. **c**, A comparison of the αN angles of of the histamine, Clobenpropit, VUF9884 and Clozapine-bound H<sub>4</sub>R/G<sub>i</sub> complex.



Supplementary Table 1. MD simulation system setting

| Box dimensions<br>(Å) | Total<br>atoms | Total<br>waters | Salt concentration | Lipid composition      |
|-----------------------|----------------|-----------------|--------------------|------------------------|
| 65 x 65 x 111         | 44795          | 27989           | KCl, 150 mM        | POPC:cholesterol = 4:1 |
