# Supplementary material for: Structural basis of ligand recognition and design of antihistamines targeting histamine H4 receptor
Source: PubMed Central journal article supplement (PMC10954740; doi:10.1038/s41467-024-46840-5), 2024-03-20
Supplement: 41467_2024_46840_MOESM3_ESM.pdf [file 41467_2024_46840_MOESM3_ESM.pdf]

**File name: Supplementary Movie 1**

**Description:** Movie track of MD simulation of histamine-bound H<sub>4</sub>R. The length is 200ns, interval is 5 steps.
